# Supplementary material for: 3D‐Printed Functional Hydrogel by DNA‐Induced Biomineralization for Accelerated Diabetic Wound Healing
Source: PubMed Central journal article supplement (PMC10265106; doi:10.1002/advs.202300816), 2023-04-19
Supplement: ADVS-10-2300816-s002.pdf [file ADVS-10-2300816-s002.pdf]

## Supporting Information

for *Adv. Sci.*, DOI 10.1002/adv.202300816

3D-Printed Functional Hydrogel by DNA-Induced Biomineralization for Accelerated Diabetic Wound Healing

*Nahyun Kim, Hyun Lee, Ginam Han, Minho Kang, Sinwoo Park, Dong Eung Kim, Minyoung Lee, Moon-Jo Kim, Yuhyun Na, SeKwon Oh, Seo-Jun Bang, Tae-Sik Jang, Hyeon-Ee Kim, Jungwon Park, Su Ryon Shin and Hyun-Do Jung\**

# Supplementary information

## 3D-printed Functional Hydrogel by DNA-induced Biomineralization for Accelerated Diabetic Wound Healing

Nahyun Kim<sup>1,2,†</sup>, Hyun Lee<sup>1,2,†</sup>, Ginam Han<sup>1,2</sup>, Minho Kang<sup>1,2</sup>, Sinwoo Park<sup>1,2</sup>, Dong Eung Kim<sup>3</sup>, Minyoung Lee<sup>4,5</sup>, Moon-Jo Kim<sup>3</sup>, Yuhyun Na<sup>1,2</sup>, SeKwon Oh<sup>3</sup>, Seo-Jun Bang<sup>1,2</sup>, Tae-Sik Jang<sup>6</sup>, Hyoun-Ee Kim<sup>7</sup>, Jungwon Park<sup>4,5</sup>, Su Ryon Shin<sup>8</sup>, Hyun-Do Jung<sup>1,2,\*</sup>

<sup>1</sup> Department of Biomedical-Chemical Engineering, The Catholic University of Korea, Bucheon, 14662, Republic of Korea

<sup>2</sup> Department of Biotechnology, The Catholic University of Korea, Bucheon, 14662, Republic of Korea

<sup>3</sup> Research Institute of Advanced Manufacturing & Materials Technology, Korea Institute of Industrial Technology, Incheon, 21999, Republic of Korea

<sup>4</sup> School of Chemical and Biological Engineering, and Institute of Chemical Processes (ICP), Seoul National University, Seoul, 08826, Republic of Korea

<sup>5</sup> Center for Nanoparticle Research, Institute of Basic Science (IBS), Seoul, 08826, Republic of Korea

<sup>6</sup> Department of Materials Science and Engineering, Chosun University, Gwangju, 61452, Republic of Korea

<sup>7</sup> Department of Materials Science and Engineering, Seoul National University, Seoul, 08826, Republic of Korea

<sup>8</sup> Division of Engineering in Medicine, Department of Medicine, Harvard Medical School, and Brigham and Women's Hospital, Cambridge, Massachusetts 02139, United States

<sup>†</sup>Both authors contributed equally to this work.

---

\* Corresponding author. Tel.: +82-2-2164-4357

E-mail address: hdjung@catholic.ac.kr (Hyun-Do Jung)

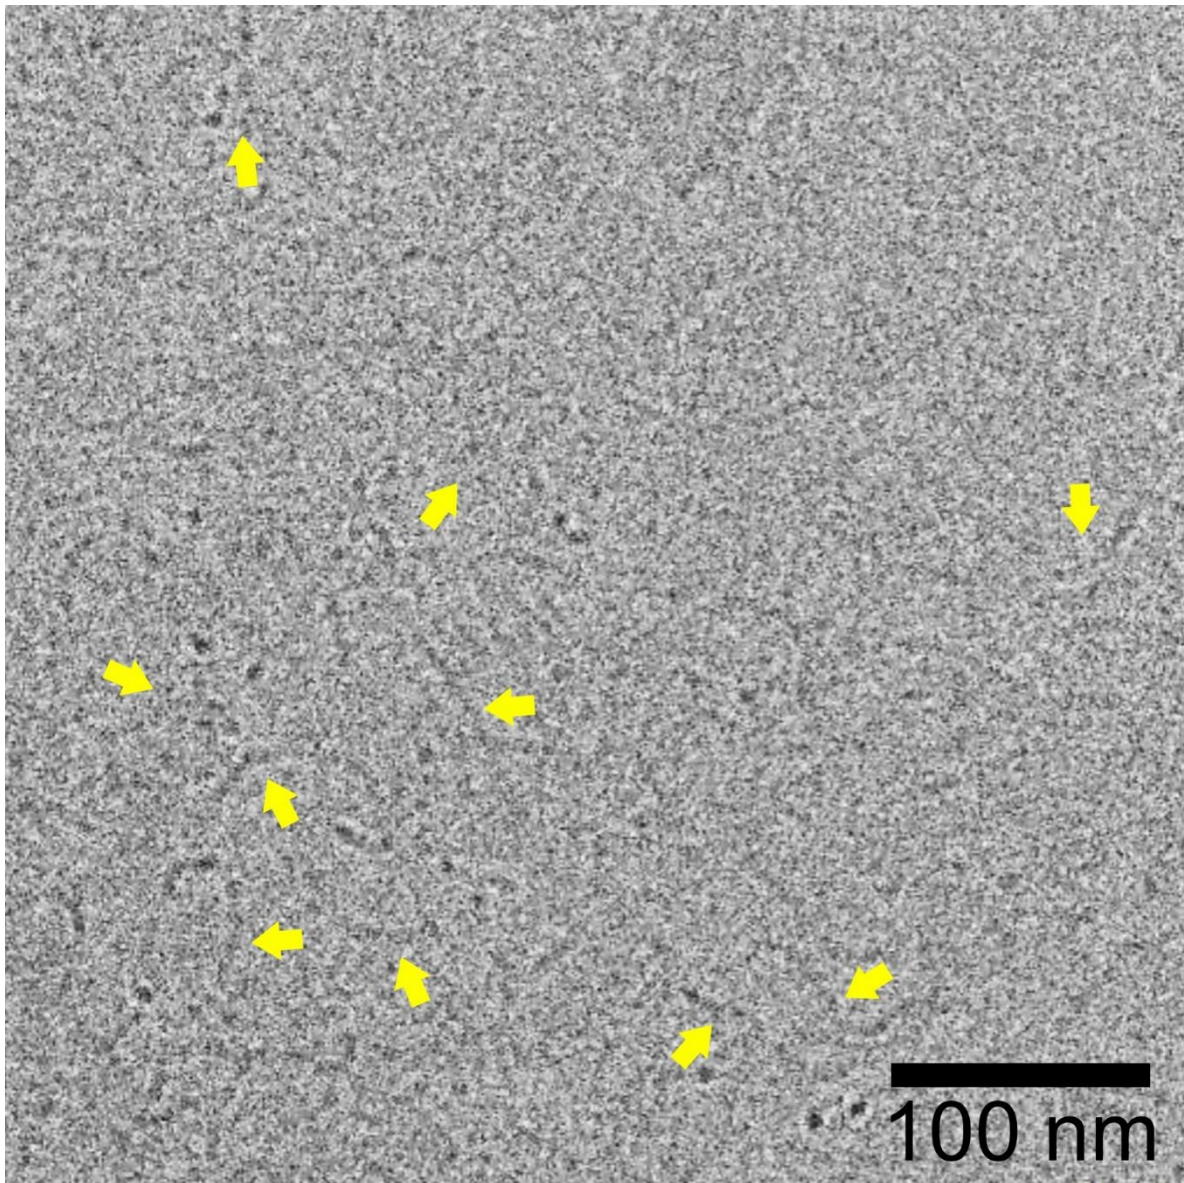

**Figure S1.** Cryo-TEM image of DNA (Yellow arrows directing DNA strand).

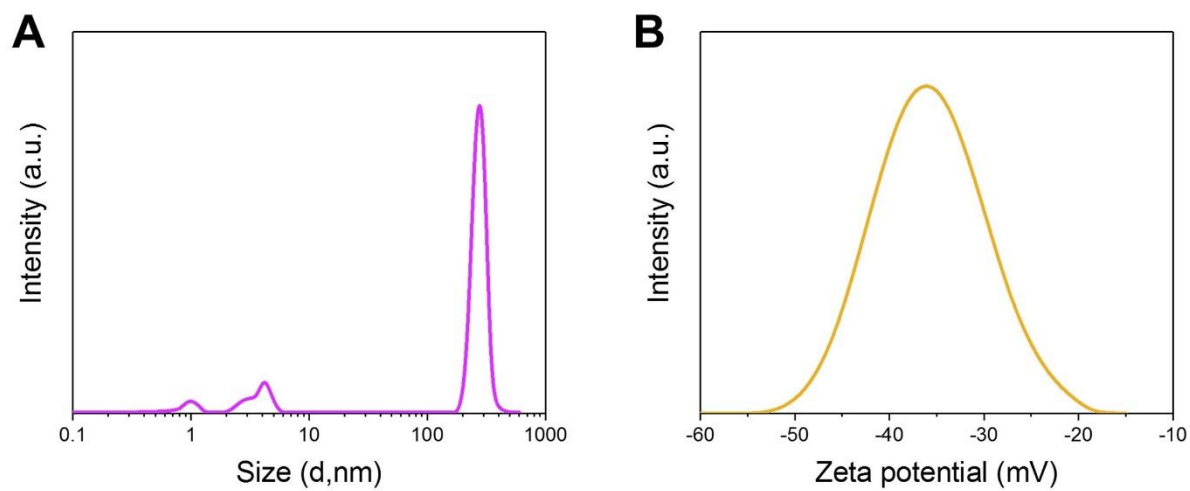

**Figure S2.** (A) Size distribution of DNA measured by DLS analysis. (B) Zeta potential distribution of incorporated DNA at pH 10.5.

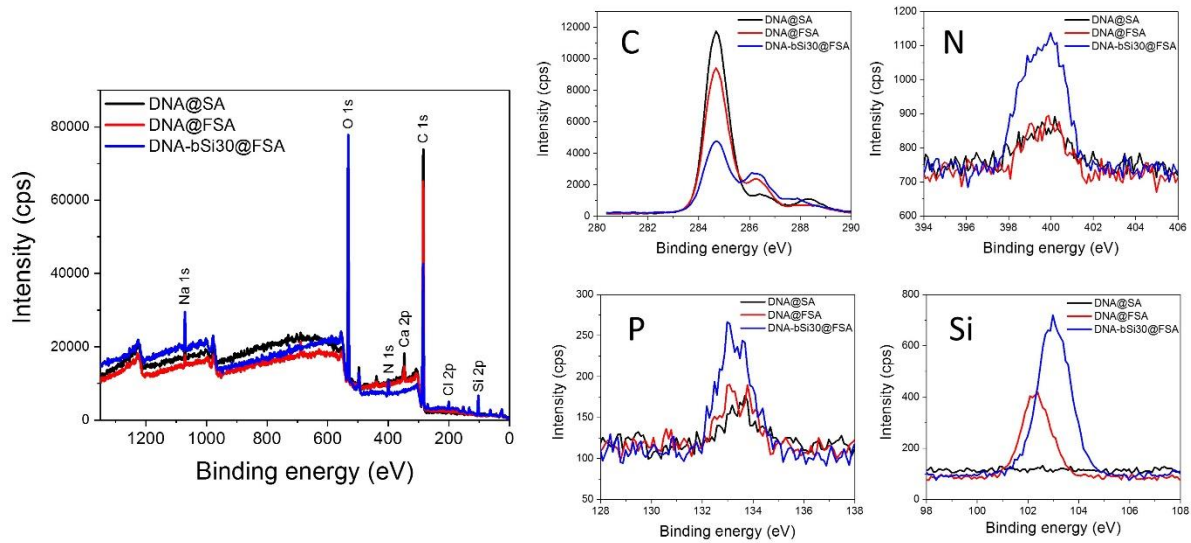

**Figure S3.** XPS results of DNA@SA, DNA@FSA, and DNA-bSi30@FSA at different elements.

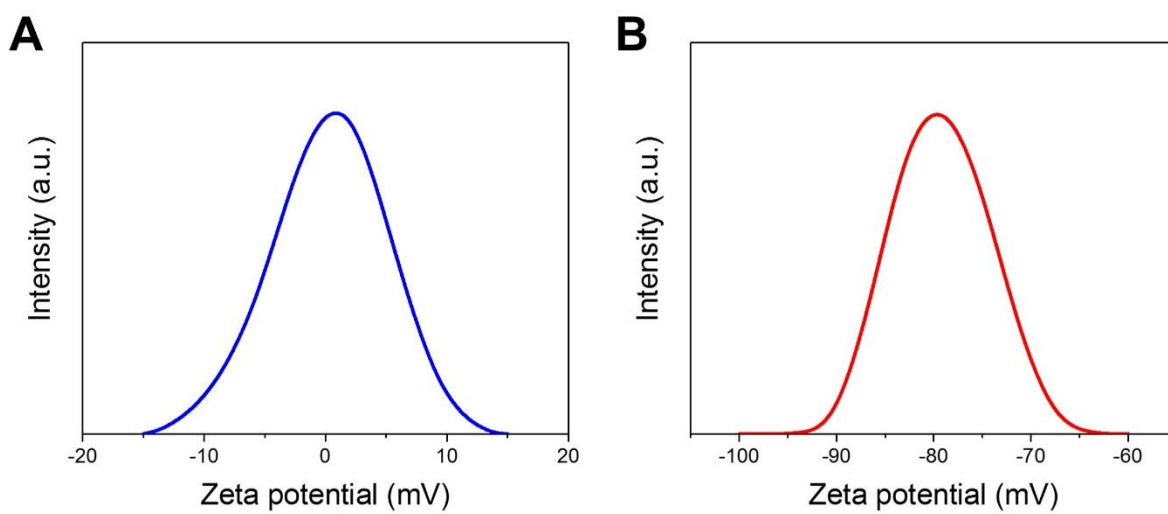

**Figure S4.** Zeta potential distributions of (A) silica precursor and (B) DNA-bSi@FSA ink.

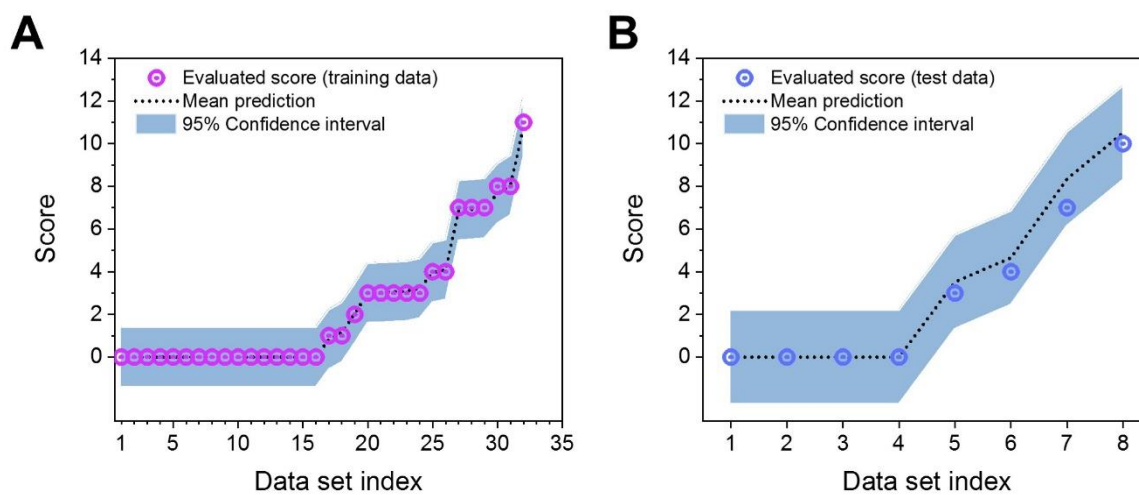

**Figure S5.** Evaluated score (circle symbol) and predicted mean score (dot line) with the 95% confidence interval (blue area) based on (A) 32 training data sets and (B) 8 test data sets.

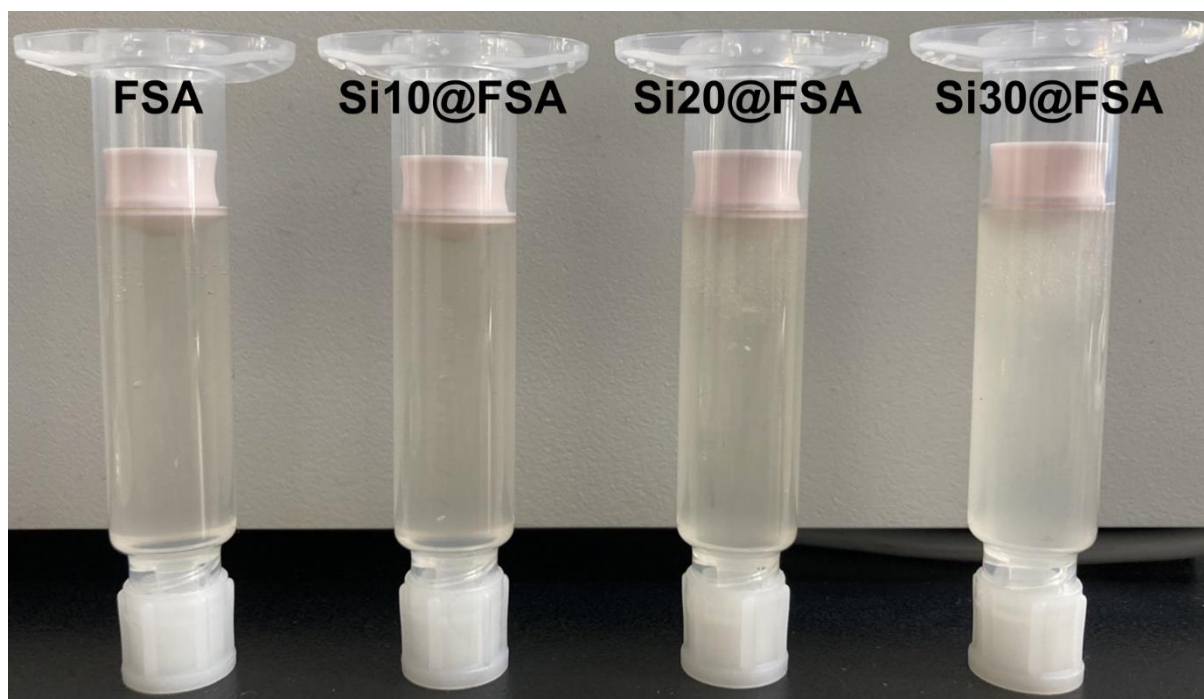

**Figure S6.** Optical images of hydrogel inks with different silica contents.



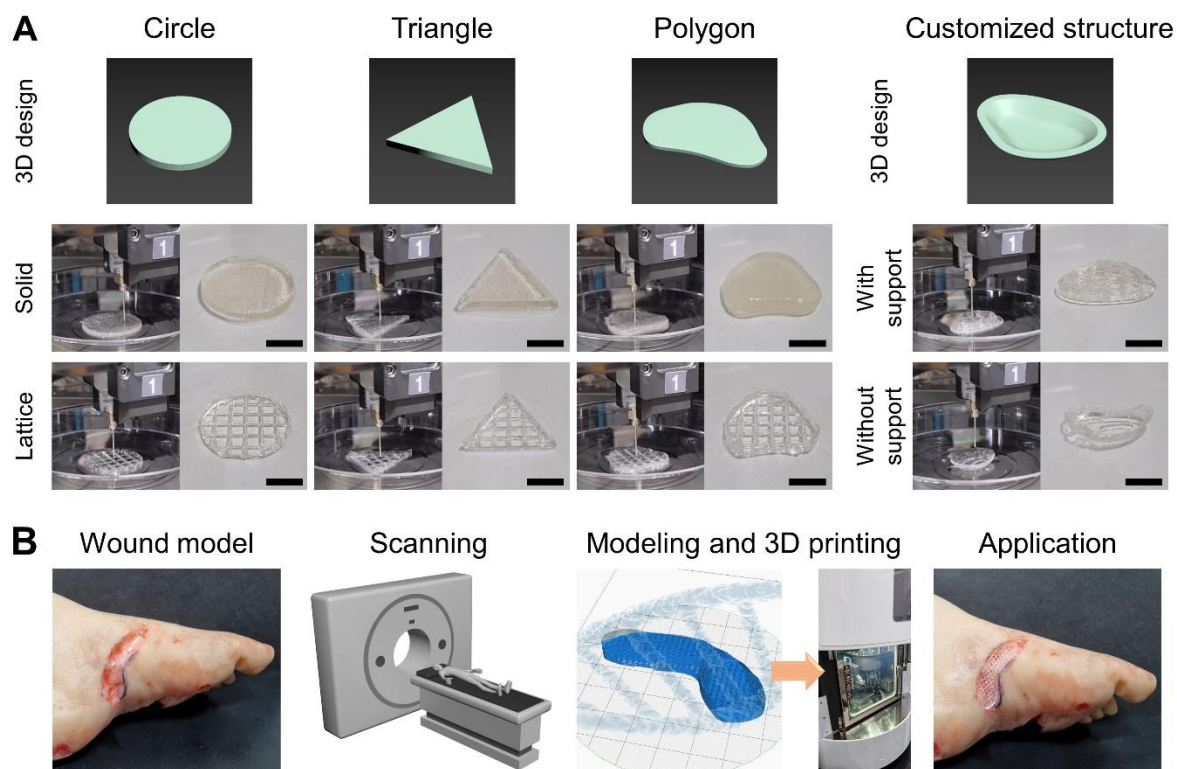

**Figure S7.** (A) 3D printing of DNA-bSi@FSA hydrogel dressings with circular, triangular, polygonal, and customized structure (scale bar: 10 mm). (B) Fabrication of 3D-printed DNA-bSi@FSA hydrogel dressing for a sample clinical application.

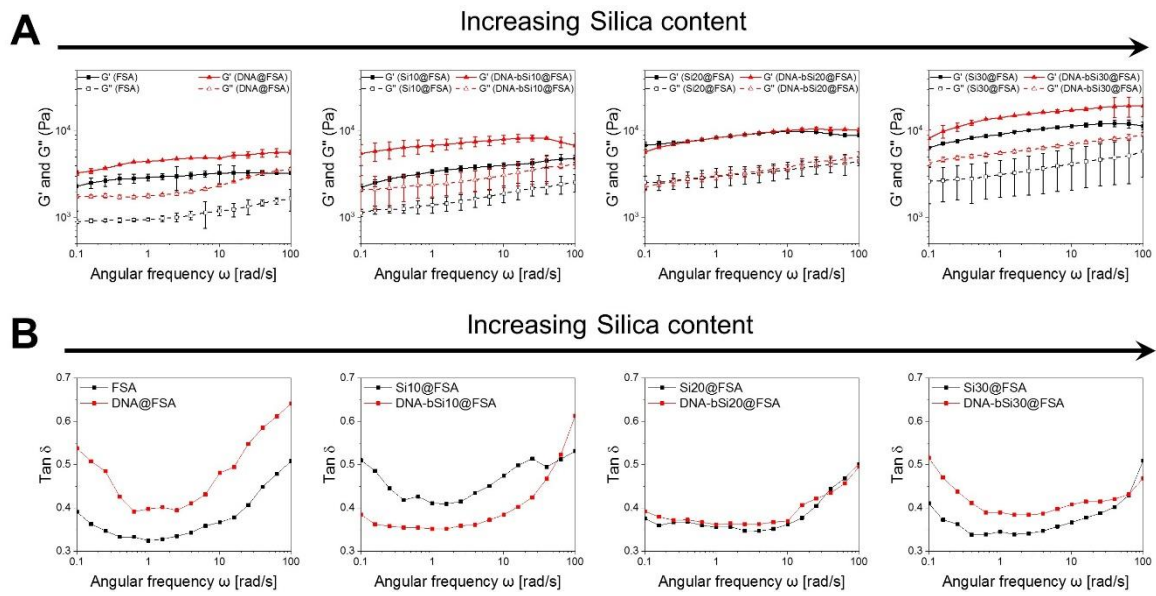

**Figure S8.** (A) Storage and loss modulus of fabricated hydrogel dressing and (B) computed  $\tan \delta$  following angular frequency.

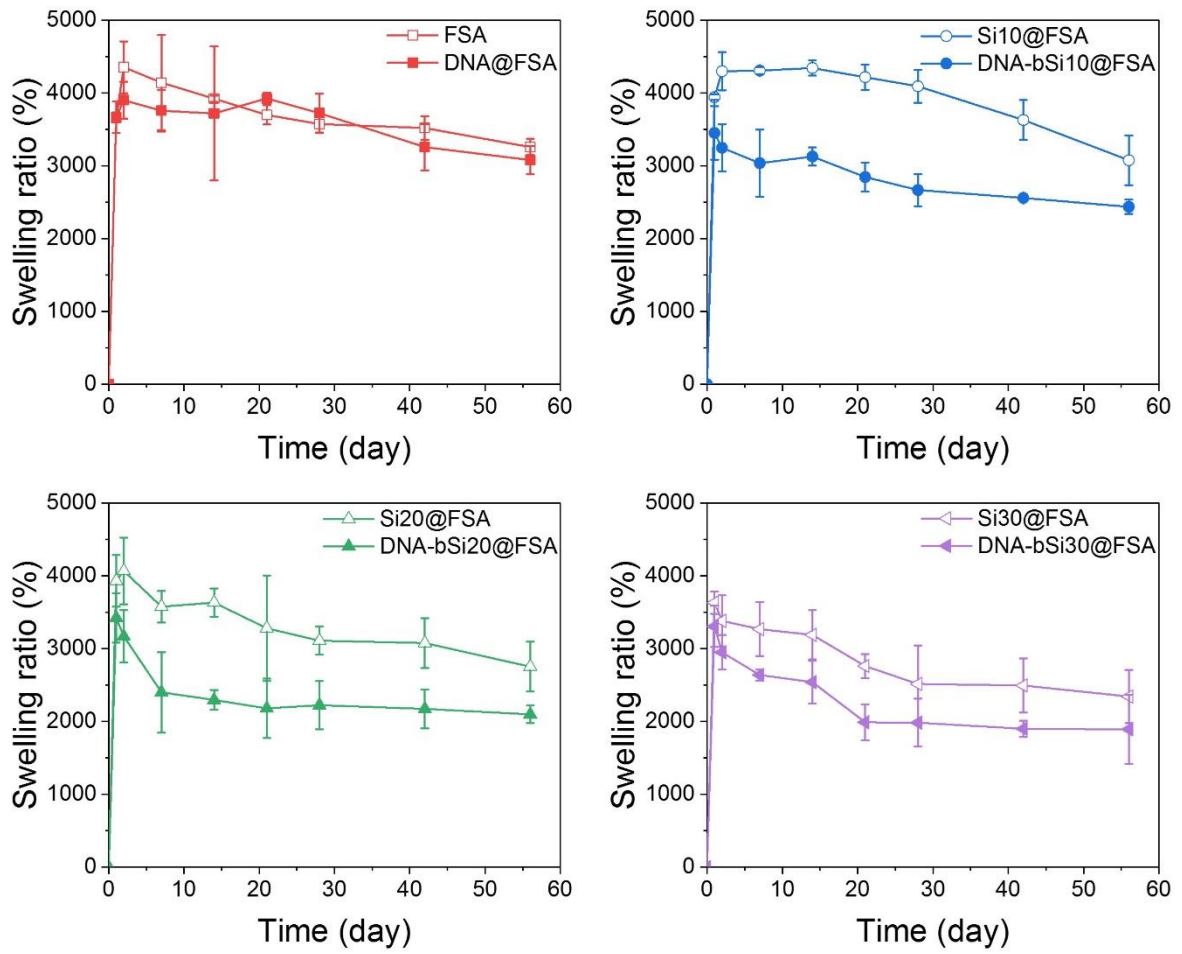

**Figure S9.** Monitored swelling ratio of 3D-printed hydrogel dressings.

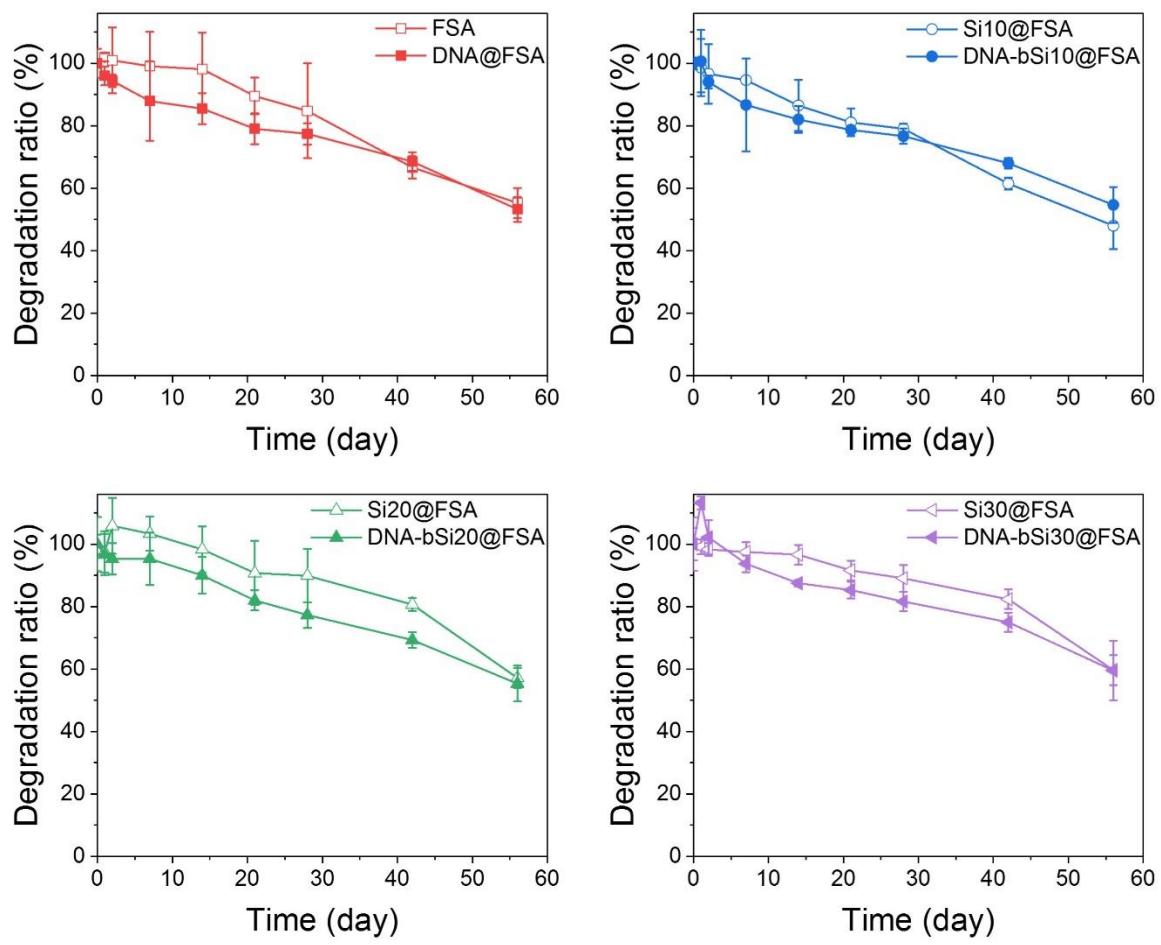

**Figure S10.** Degradation ratio of 3D-printed hydrogel dressings in DPBS.

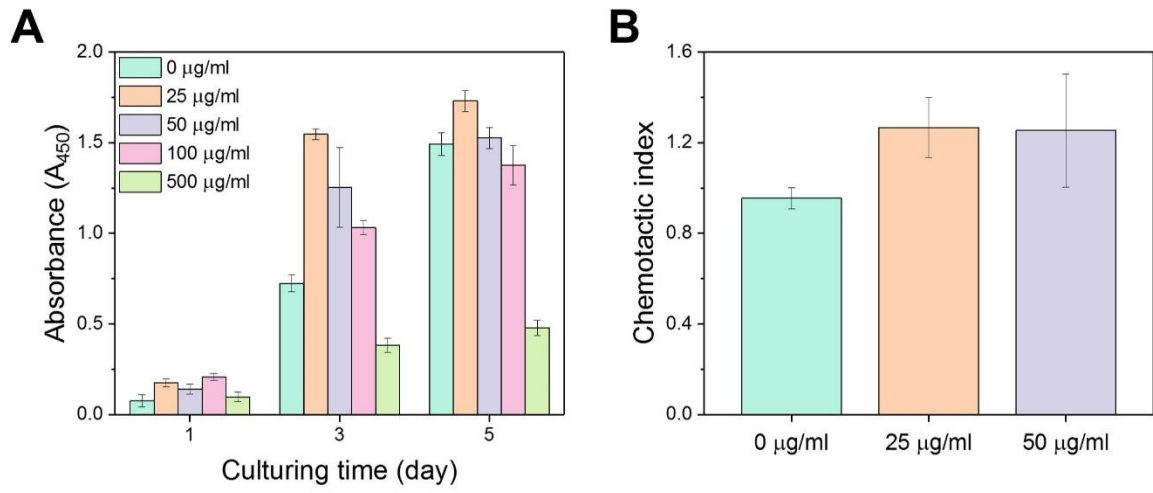

**Figure S11.** Comparison of (A) L929 proliferation and (B) chemotactic index with altered DNA concentration.

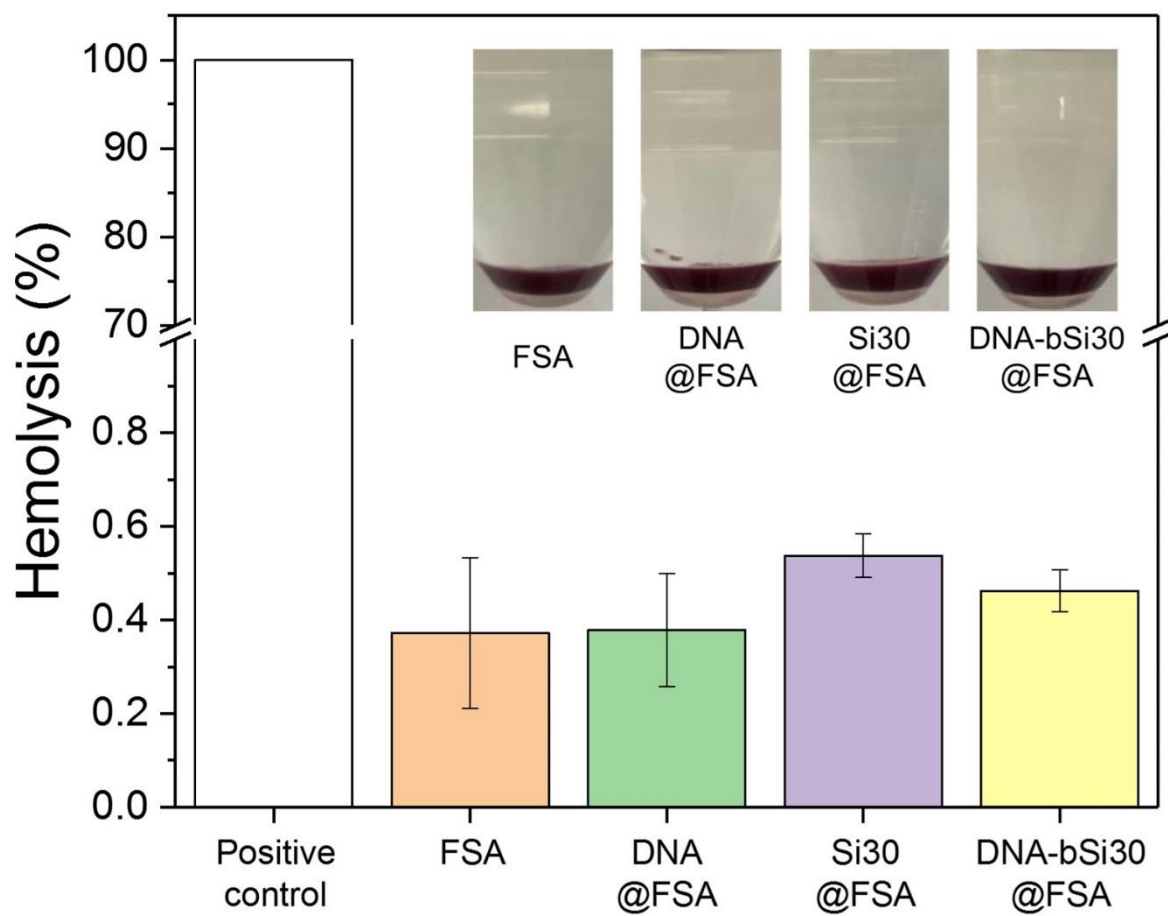

**Figure S12.** Hemolysis rates of FSA, DNA@ FSA, Si30@ FSA, and DNA-bSi30@ FSA (Inset represents image of samples after centrifugation).

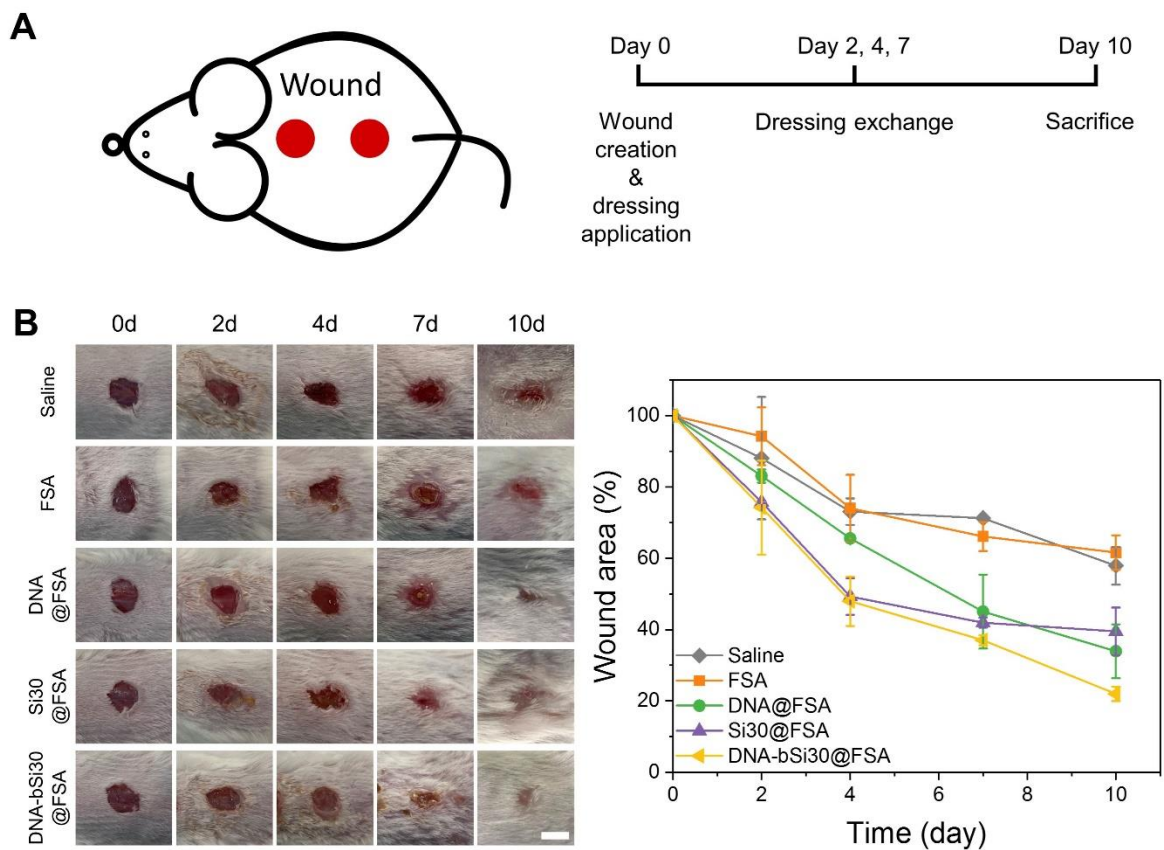

**Figure S13.** (A) Scheme and the time table of *in vivo* acute wound healing experiments. (B) Optical images of wound sites and computed wound area at 0, 2, 4, 7, and 10 days (scale bar: 5 mm).

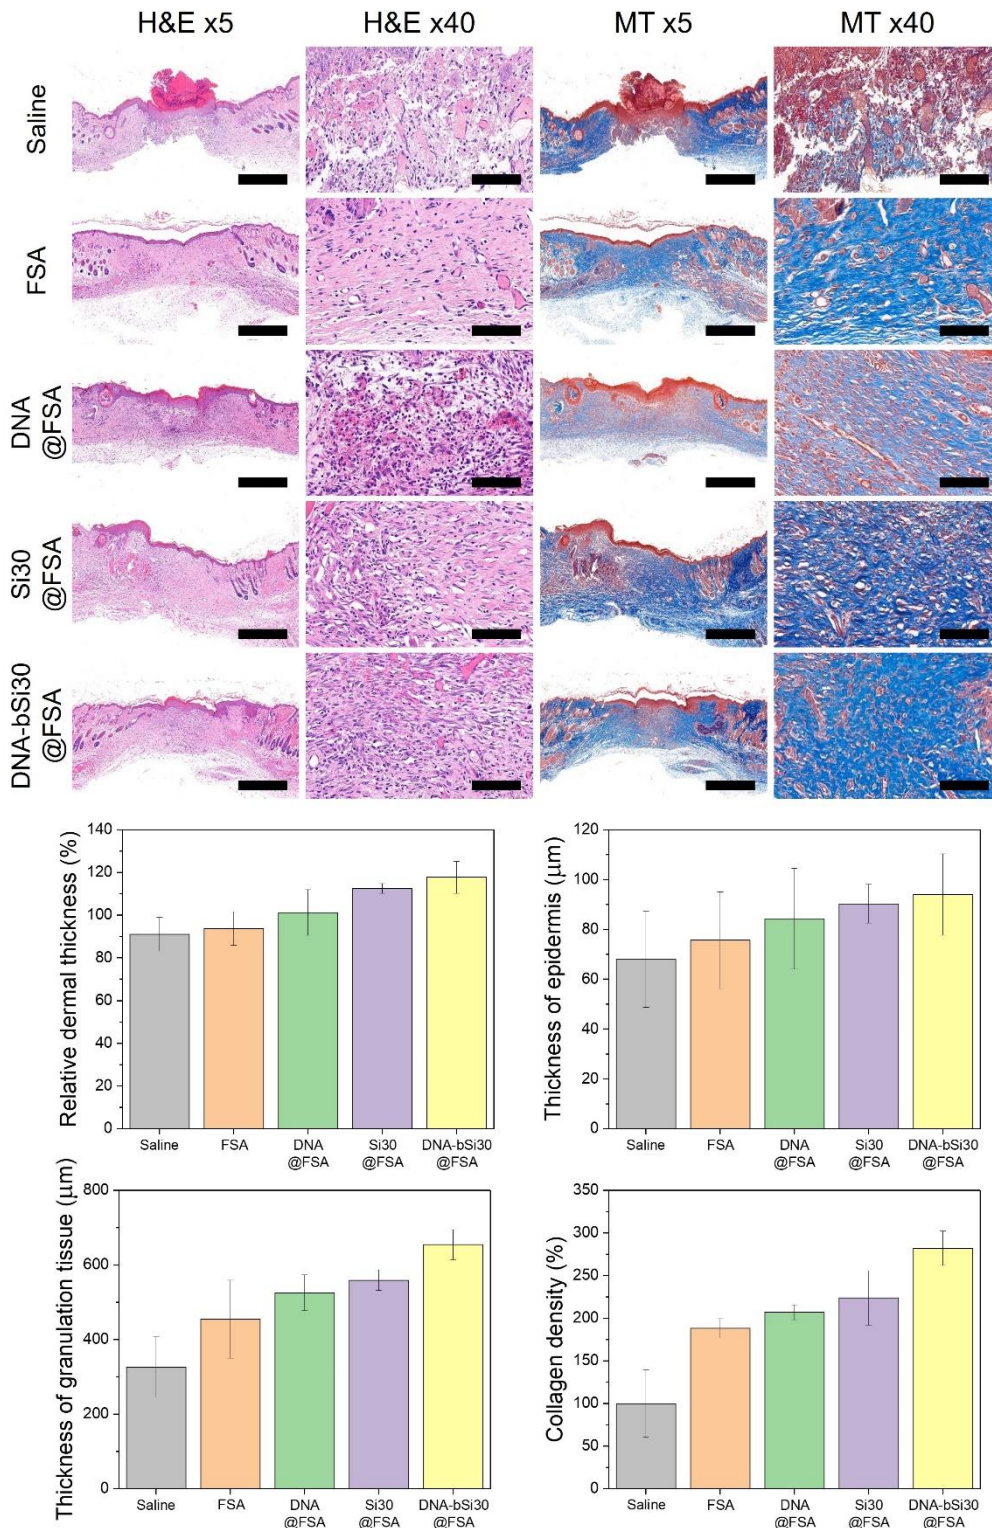

**Figure S14.** Images of H&E and MT stained skin tissues and measured factors related with skin tissue regeneration of acute *in vivo* wound healing experiment (scale bar : 500 µm for x5 magnification and 50 µm for x40 magnification).



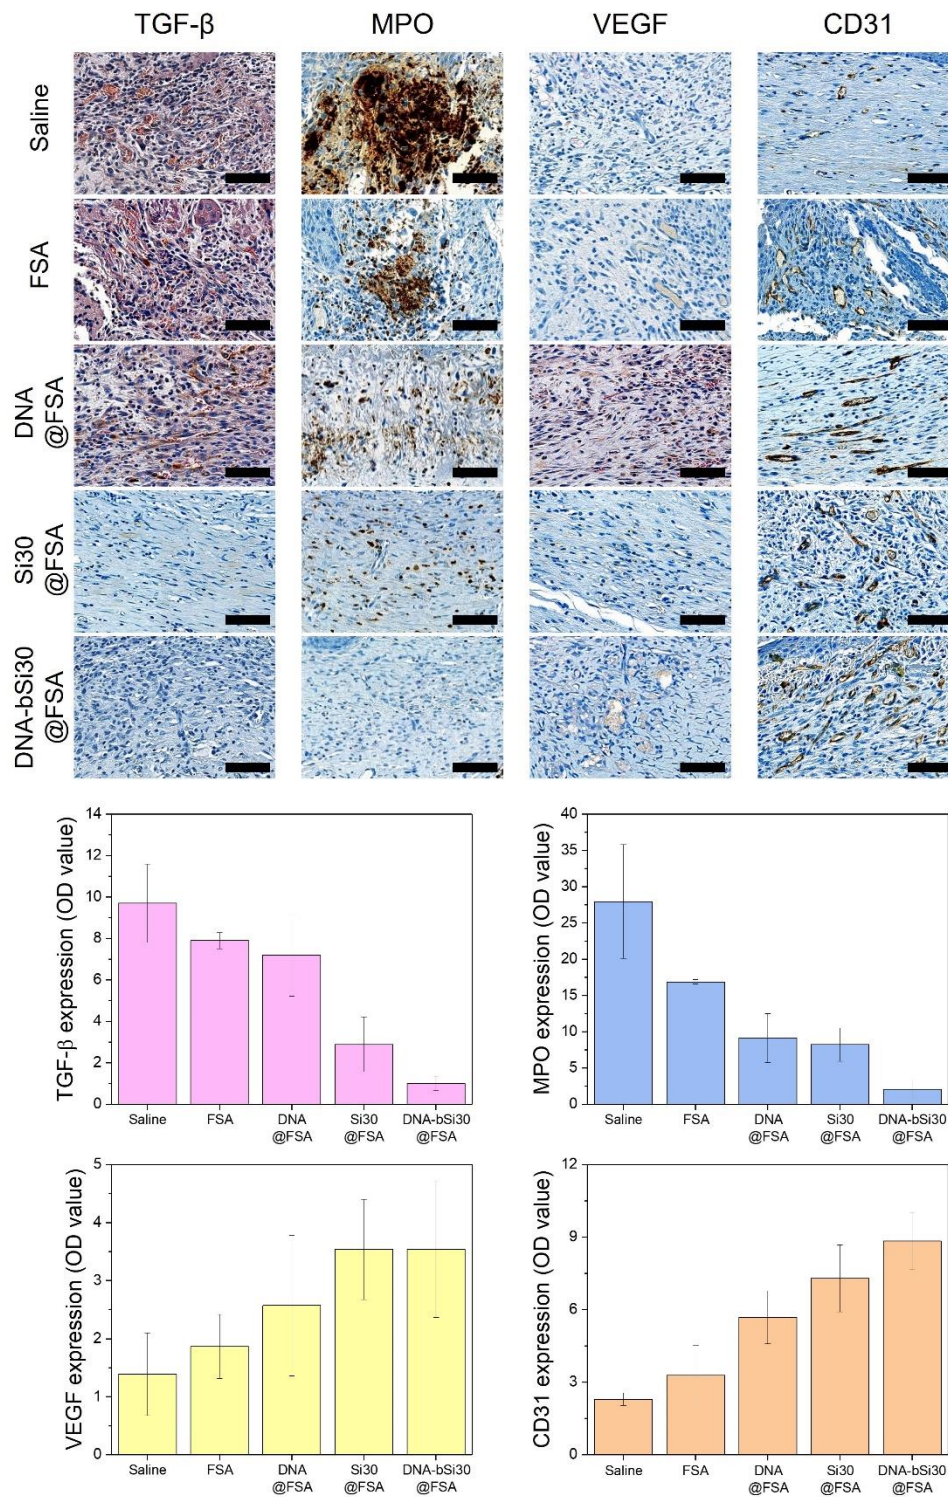

**Figure S15.** Immunohistochemical analysis regarding inflammation (TGF-β and MPO) and angiogenesis (VEGF and CD31) of skin tissues of acute *in vivo* wound healing experiment (scale bar: 50 μm).

**Table S1.** Dataset for machine learning modeling with input variables (FSA concentration, nozzle size, temperature, pneumatic pressure) and output variable (score).

| Input variable            |                  |                  |                          | Output variable |
|---------------------------|------------------|------------------|--------------------------|-----------------|
| FSA concentration (% w/v) | Nozzle size (mm) | Temperature (°C) | Pneumatic pressure (kPa) | Score           |
| 1                         | 0.2              | 27               | 20                       | 0               |
|                           |                  | 37               | 60                       | 0               |
|                           |                  | 37               | 20                       | 0               |
|                           | 0.4              | 27               | 60                       | 3               |
|                           |                  | 37               | 20                       | 3               |
|                           |                  | 37               | 60                       | 7               |
| 2                         | 0.2              | 27               | 20                       | 0               |
|                           |                  | 37               | 60                       | 0               |
|                           |                  | 37               | 20                       | 0               |
|                           | 0.4              | 27               | 60                       | 3               |
|                           |                  | 37               | 20                       | 4               |
|                           |                  | 37               | 60                       | 7               |
| 2.5                       | 0.2              | 27               | 20                       | 0               |
|                           |                  | 37               | 60                       | 0               |
|                           |                  | 37               | 20                       | 0               |
|                           | 0.4              | 27               | 60                       | 3               |
|                           |                  | 37               | 20                       | 4               |
|                           |                  | 37               | 60                       | 7               |
| 3                         | 0.2              | 27               | 20                       | 0               |
|                           |                  | 37               | 60                       | 0               |
|                           |                  | 37               | 20                       | 0               |
|                           | 0.4              | 27               | 60                       | 3               |
|                           |                  | 37               | 20                       | 4               |
|                           |                  | 37               | 60                       | 7               |
| 4                         | 0.2              | 27               | 20                       | 0               |
|                           |                  | 37               | 60                       | 0               |
|                           |                  | 37               | 20                       | 0               |
|                           | 0.4              | 27               | 60                       | 1               |
|                           |                  | 37               | 20                       | 1               |
|                           |                  | 37               | 60                       | 2               |
|                           |                  |                  | 60                       | 3               |

**Table S2.** Intergroup statistical comparisons of storage modulus and loss modulus of ink at 1Hz.

| Sample 1 - Sample 2           | Significance    |              |
|-------------------------------|-----------------|--------------|
|                               | Storage modulus | Loss modulus |
| FSA - Si10@FSA                | 1.000           | 1.000        |
| FSA - Si20@FSA                | 0.005**         | 0.005**      |
| FSA - Si30@FSA                | 0.000****       | 0.000****    |
| FSA - DNA@FSA                 | 0.952           | 0.952        |
| FSA - DNA-bSi10@FSA           | 0.269           | 0.269        |
| FSA - DNA-bSi20@FSA           | 0.004***        | 0.004***     |
| FSA - DNA-bSi30@FSA           | 0.000****       | 0.000****    |
| Si10@FSA - Si20@FSA           | 0.009**         | 0.009**      |
| Si10@FSA - Si30@FSA           | 0.000****       | 0.000****    |
| Si10@FSA - DNA@FSA            | 0.994           | 0.994        |
| Si10@FSA - DNA-bSi10@FSA      | 0.433           | 0.433        |
| Si10@FSA - DNA-bSi20@FSA      | 0.008**         | 0.008**      |
| Si10@FSA - DNA-bSi30@FSA      | 0.000****       | 0.000****    |
| Si20@FSA - Si30@FSA           | 0.386           | 0.386        |
| Si20@FSA - DNA@FSA            | 0.039*          | 0.039*       |
| Si20@FSA - DNA-bSi10@FSA      | 0.403           | 0.403        |
| Si20@FSA - DNA-bSi20@FSA      | 1.000           | 1.000        |
| Si20@FSA - DNA-bSi30@FSA      | 0.000****       | 0.000****    |
| Si30@FSA - DNA@FSA            | 0.001***        | 0.001***     |
| Si30@FSA - DNA-bSi10@FSA      | 0.008**         | 0.008**      |
| Si30@FSA - DNA-bSi20@FSA      | 0.430           | 0.430        |
| Si30@FSA - DNA-bSi30@FSA      | 0.002***        | 0.002***     |
| DNA@FSA - DNA-bSi10@FSA       | 0.844           | 0.844        |
| DNA@FSA - DNA-bSi20@FSA       | 0.033*          | 0.033*       |
| DNA@FSA - DNA-bSi30@FSA       | 0.000****       | 0.000****    |
| DNA-bSi10@FSA - DNA-bSi20@FSA | 0.361           | 0.361        |
| DNA-bSi10@FSA - DNA-bSi30@FSA | 0.000****       | 0.000****    |
| DNA-bSi20@FSA - DNA-bSi30@FSA | 0.000****       | 0.000****    |

**Table S3.** Intergroup statistical comparisons of average pore size.

| Sample 1 - Sample 2           | Significance |
|-------------------------------|--------------|
| FSA - Si10@FSA                | 0.432        |
| FSA - Si20@FSA                | 0.391        |
| FSA - Si30@FSA                | 0.115        |
| FSA - DNA@FSA                 | 0.389        |
| FSA - DNA-bSi10@FSA           | 0.341        |
| FSA - DNA-bSi20@FSA           | 0.326        |
| FSA - DNA-bSi30@FSA           | 0.004***     |
| Si10@FSA - Si20@FSA           | 0.918        |
| Si10@FSA - Si30@FSA           | 0.374        |
| Si10@FSA - DNA@FSA            | 0.094        |
| Si10@FSA - DNA-bSi10@FSA      | 0.869        |
| Si10@FSA - DNA-bSi20@FSA      | 0.827        |
| Si10@FSA - DNA-bSi30@FSA      | 0.028*       |
| Si20@FSA - Si30@FSA           | 0.444        |
| Si20@FSA - DNA@FSA            | 0.086        |
| Si20@FSA - DNA-bSi10@FSA      | 0.957        |
| Si20@FSA - DNA-bSi20@FSA      | 0.912        |
| Si20@FSA - DNA-bSi30@FSA      | 0.046*       |
| Si30@FSA - DNA@FSA            | 0.017*       |
| Si30@FSA - DNA-bSi10@FSA      | 0.453        |
| Si30@FSA - DNA-bSi20@FSA      | 0.500        |
| Si30@FSA - DNA-bSi30@FSA      | 0.303        |
| DNA@FSA - DNA-bSi10@FSA       | 0.065        |
| DNA@FSA - DNA-bSi20@FSA       | 0.064        |
| DNA@FSA - DNA-bSi30@FSA       | 0.000****    |
| DNA-bSi10@FSA - DNA-bSi20@FSA | 0.952        |
| DNA-bSi10@FSA - DNA-bSi30@FSA | 0.055        |
| DNA-bSi20@FSA - DNA-bSi30@FSA | 0.039*       |

**Table S4.** Intergroup statistical comparisons of storage modulus and loss modulus of scaffolds at 1Hz.

| Sample 1 - Sample 2           | Significance    |              |
|-------------------------------|-----------------|--------------|
|                               | Storage modulus | Loss modulus |
| FSA - Si10@FSA                | 0.603           | 0.957        |
| FSA - Si20@FSA                | 0.018*          | 0.004***     |
| FSA - Si30@FSA                | 0.002***        | 0.000****    |
| FSA - DNA@FSA                 | 0.299           | 0.536        |
| FSA - DNA-bSi10@FSA           | 0.119           | 0.053        |
| FSA - DNA-bSi20@FSA           | 0.021*          | 0.003***     |
| FSA - DNA-bSi30@FSA           | 0.000****       | 0.000****    |
| Si10@FSA - Si20@FSA           | 0.065           | 0.029*       |
| Si10@FSA - Si30@FSA           | 0.009**         | 0.000****    |
| Si10@FSA - DNA@FSA            | 0.603           | 0.982        |
| Si10@FSA - DNA-bSi10@FSA      | 0.299           | 0.315        |
| Si10@FSA - DNA-bSi20@FSA      | 0.073           | 0.024*       |
| Si10@FSA - DNA-bSi30@FSA      | 0.002***        | 0.000****    |
| Si20@FSA - Si30@FSA           | 0.453           | 0.205        |
| Si20@FSA - DNA@FSA            | 0.184           | 0.149        |
| Si20@FSA - DNA-bSi10@FSA      | 0.419           | 0.854        |
| Si20@FSA - DNA-bSi20@FSA      | 0.954           | 1.000        |
| Si20@FSA - DNA-bSi30@FSA      | 0.204           | 0.000****    |
| Si30@FSA - DNA@FSA            | 0.038*          | 0.001***     |
| Si30@FSA - DNA-bSi10@FSA      | 0.119           | 0.017*       |
| Si30@FSA - DNA-bSi20@FSA      | 0.419           | 0.238        |
| Si30@FSA - DNA-bSi30@FSA      | 0.603           | 0.052        |
| DNA@FSA - DNA-bSi10@FSA       | 0.603           | 0.809        |
| DNA@FSA - DNA-bSi20@FSA       | 0.204           | 0.126        |
| DNA@FSA - DNA-bSi30@FSA       | 0.009**         | 0.000****    |
| DNA-bSi10@FSA - DNA-bSi20@FSA | 0.453           | 0.810        |
| DNA-bSi10@FSA - DNA-bSi30@FSA | 0.038*          | 0.000****    |
| DNA-bSi20@FSA - DNA-bSi30@FSA | 0.184           | 0.000****    |

**Table S5.** Intergroup statistical comparisons of compressive properties of fabricated 3D-printed hydrogel dressings.

| Sample 1 - Sample 2           | Significance         |                                                |
|-------------------------------|----------------------|------------------------------------------------|
|                               | Compressive strength | Compressive modulus                            |
| FSA - Si10@FSA                | 0.488                | Not statistically different between the groups |
| FSA - Si20@FSA                | 0.073                |                                                |
| FSA - Si30@FSA                | 0.028*               |                                                |
| FSA - DNA@FSA                 | 0.488                |                                                |
| FSA - DNA-bSi10@FSA           | 0.204                |                                                |
| FSA - DNA-bSi20@FSA           | 0.018*               |                                                |
| FSA - DNA-bSi30@FSA           | 0.001***             |                                                |
| Si10@FSA - Si20@FSA           | 0.273                |                                                |
| Si10@FSA - Si30@FSA           | 0.133                |                                                |
| Si10@FSA - DNA@FSA            | 1.000                |                                                |
| Si10@FSA - DNA-bSi10@FSA      | 0.564                |                                                |
| Si10@FSA - DNA-bSi20@FSA      | 0.094                |                                                |
| Si10@FSA - DNA-bSi30@FSA      | 0.011*               |                                                |
| Si20@FSA - Si30@FSA           | 0.686                |                                                |
| Si20@FSA - DNA@FSA            | 0.273                |                                                |
| Si20@FSA - DNA-bSi10@FSA      | 0.603                |                                                |
| Si20@FSA - DNA-bSi20@FSA      | 0.564                |                                                |
| Si20@FSA - DNA-bSi30@FSA      | 0.149                |                                                |
| Si30@FSA - DNA@FSA            | 0.133                |                                                |
| Si30@FSA - DNA-bSi10@FSA      | 0.356                |                                                |
| Si30@FSA - DNA-bSi20@FSA      | 0.862                |                                                |
| Si30@FSA - DNA-bSi30@FSA      | 0.299                |                                                |
| DNA@FSA - DNA-bSi10@FSA       | 0.564                |                                                |
| DNA@FSA - DNA-bSi20@FSA       | 0.094                |                                                |
| DNA@FSA - DNA-bSi30@FSA       | 0.011*               |                                                |
| DNA-bSi10@FSA - DNA-bSi20@FSA | 0.273                |                                                |
| DNA-bSi10@FSA - DNA-bSi30@FSA | 0.050                |                                                |
| DNA-bSi20@FSA - DNA-bSi30@FSA | 0.386                |                                                |

**Table S6.** Intergroup statistical comparisons of fluorescent intensity.

| Sample 1 - Sample 2           | Significance |
|-------------------------------|--------------|
| FSA - Si10@FSA                | 1.000        |
| FSA - Si20@FSA                | 0.995        |
| FSA - Si30@FSA                | 0.780        |
| FSA - DNA@FSA                 | 1.000        |
| FSA - DNA-bSi10@FSA           | 0.999        |
| FSA - DNA-bSi20@FSA           | 0.818        |
| FSA - DNA-bSi30@FSA           | 0.035*       |
| Si10@FSA - Si20@FSA           | 1.000        |
| Si10@FSA - Si30@FSA           | 0.949        |
| Si10@FSA - DNA@FSA            | 1.000        |
| Si10@FSA - DNA-bSi10@FSA      | 1.000        |
| Si10@FSA - DNA-bSi20@FSA      | 0.964        |
| Si10@FSA - DNA-bSi30@FSA      | 0.088        |
| Si20@FSA - Si30@FSA           | 0.992        |
| Si20@FSA - DNA@FSA            | 1.000        |
| Si20@FSA - DNA-bSi10@FSA      | 1.000        |
| Si20@FSA - DNA-bSi20@FSA      | 0.995        |
| Si20@FSA - DNA-bSi30@FSA      | 0.160        |
| Si30@FSA - DNA@FSA            | 0.992        |
| Si30@FSA - DNA-bSi10@FSA      | 0.967        |
| Si30@FSA - DNA-bSi20@FSA      | 1.000        |
| Si30@FSA - DNA-bSi30@FSA      | 0.540        |
| DNA@FSA - DNA-bSi10@FSA       | 1.000        |
| DNA@FSA - DNA-bSi20@FSA       | 0.943        |
| DNA@FSA - DNA-bSi30@FSA       | 0.071        |
| DNA-bSi10@FSA - DNA-bSi20@FSA | 0.978        |
| DNA-bSi10@FSA - DNA-bSi30@FSA | 0.104        |
| DNA-bSi20@FSA - DNA-bSi30@FSA | 0.495        |

**Table S7.** Intergroup statistical comparisons of cell proliferation cultured on the scaffolds after 3 and 5 days.

| Sample 1 - Sample 2           | Significance |          |
|-------------------------------|--------------|----------|
|                               | 3d           | 5d       |
| FSA - Si10@FSA                | 0.908        | 0.817    |
| FSA - Si20@FSA                | 0.273        | 0.149    |
| FSA - Si30@FSA                | 0.024*       | 0.028*   |
| FSA - DNA@FSA                 | 0.326        | 0.862    |
| FSA - DNA-bSi10@FSA           | 0.043*       | 0.299    |
| FSA - DNA-bSi20@FSA           | 0.005**      | 0.038*   |
| FSA - DNA-bSi30@FSA           | 0.001***     | 0.006**  |
| Si10@FSA - Si20@FSA           | 0.326        | 0.094    |
| Si10@FSA - Si30@FSA           | 0.033*       | 0.015*   |
| Si10@FSA - DNA@FSA            | 0.386        | 0.686    |
| Si10@FSA - DNA-bSi10@FSA      | 0.057        | 0.204    |
| Si10@FSA - DNA-bSi20@FSA      | 0.007**      | 0.021*   |
| Si10@FSA - DNA-bSi30@FSA      | 0.001***     | 0.003*** |
| Si20@FSA - Si30@FSA           | 0.248        | 0.453    |
| Si20@FSA - DNA@FSA            | 0.908        | 0.204    |
| Si20@FSA - DNA-bSi10@FSA      | 0.356        | 0.686    |
| Si20@FSA - DNA-bSi20@FSA      | 0.083        | 0.525    |
| Si20@FSA - DNA-bSi30@FSA      | 0.021*       | 0.184    |
| Si30@FSA - DNA@FSA            | 0.204        | 0.043*   |
| Si30@FSA - DNA-bSi10@FSA      | 0.817        | 0.248    |
| Si30@FSA - DNA-bSi20@FSA      | 0.564        | 0.908    |
| Si30@FSA - DNA-bSi30@FSA      | 0.248        | 0.564    |
| DNA@FSA - DNA-bSi10@FSA       | 0.299        | 0.386    |
| DNA@FSA - DNA-bSi20@FSA       | 0.065        | 0.057    |
| DNA@FSA - DNA-bSi30@FSA       | 0.015*       | 0.009**  |
| DNA-bSi10@FSA - DNA-bSi20@FSA | 0.419        | 0.299    |
| DNA-bSi10@FSA - DNA-bSi30@FSA | 0.166        | 0.083    |
| DNA-bSi20@FSA - DNA-bSi30@FSA | 0.564        | 0.488    |



**Table S8.** Intergroup statistical comparisons of cell migration.

| Sample 1 - Sample 2             | Significance | Sample 1 - Sample 2                   | Significance |
|---------------------------------|--------------|---------------------------------------|--------------|
| FSA_6h - Si10@FSA_6h            | 1.000        | DNA@FSA_6h - Si30@FSA_12h             | 0.189        |
| FSA_6h - Si20@FSA_6h            | 0.268        | DNA@FSA_6h - DNA@FSA_12h              | 0.221        |
| FSA_6h - Si30@FSA_6h            | 0.307        | DNA@FSA_6h - DNA-bSi10@FSA_12h        | 0.210        |
| FSA_6h - DNA@FSA_6h             | 0.351        | DNA@FSA_6h - DNA-bSi20@FSA_12h        | 0.027*       |
| FSA_6h - DNA-bSi10@FSA_6h       | 0.243        | DNA@FSA_6h - DNA-bSi30@FSA_12h        | 0.006**      |
| FSA_6h - DNA-bSi20@FSA_6h       | 0.041*       | DNA-bSi10@FSA_6h - DNA-bSi20@FSA_6h   | 0.382        |
| FSA_6h - DNA-bSi30@FSA_6h       | 0.001***     | DNA-bSi10@FSA_6h - DNA-bSi30@FSA_6h   | 0.044*       |
| FSA_6h - FSA_12h                | 0.085        | DNA-bSi10@FSA_6h - FSA_12h            | 0.580        |
| FSA_6h - Si10@FSA_12h           | 0.058        | DNA-bSi10@FSA_6h - Si10@FSA_12h       | 0.466        |
| FSA_6h - Si20@FSA_12h           | 0.029*       | DNA-bSi10@FSA_6h - Si20@FSA_12h       | 0.307        |
| FSA_6h - Si30@FSA_12h           | 0.025*       | DNA-bSi10@FSA_6h - Si30@FSA_12h       | 0.281        |
| FSA_6h - DNA@FSA_12h            | 0.031*       | DNA-bSi10@FSA_6h - DNA@FSA_12h        | 0.321        |
| FSA_6h - DNA-bSi10@FSA_12h      | 0.029*       | DNA-bSi10@FSA_6h - DNA-bSi10@FSA_12h  | 0.307        |
| FSA_6h - DNA-bSi20@FSA_12h      | 0.002***     | DNA-bSi10@FSA_6h - DNA-bSi20@FSA_12h  | 0.047*       |
| FSA_6h - DNA-bSi30@FSA_12h      | 0.000****    | DNA-bSi10@FSA_6h - DNA-bSi30@FSA_12h  | 0.011*       |
| Si10@FSA_6h - Si20@FSA_6h       | 0.268        | DNA-bSi20@FSA_6h - DNA-bSi30@FSA_6h   | 0.255        |
| Si10@FSA_6h - Si30@FSA_6h       | 0.307        | DNA-bSi20@FSA_6h - FSA_12h            | 0.748        |
| Si10@FSA_6h - DNA@FSA_6h        | 0.351        | DNA-bSi20@FSA_6h - Si10@FSA_12h       | 0.884        |
| Si10@FSA_6h - DNA-bSi10@FSA_6h  | 0.243        | DNA-bSi20@FSA_6h - Si20@FSA_12h       | 0.884        |
| Si10@FSA_6h - DNA-bSi20@FSA_6h  | 0.041*       | DNA-bSi20@FSA_6h - Si30@FSA_12h       | 0.838        |
| Si10@FSA_6h - DNA-bSi30@FSA_6h  | 0.001***     | DNA-bSi20@FSA_6h - DNA@FSA_12h        | 0.907        |
| Si10@FSA_6h - FSA_12h           | 0.085        | DNA-bSi20@FSA_6h - DNA-bSi10@FSA_12h  | 0.884        |
| Si10@FSA_6h - Si10@FSA_12h      | 0.058        | DNA-bSi20@FSA_6h - DNA-bSi20@FSA_12h  | 0.268        |
| Si10@FSA_6h - Si20@FSA_12h      | 0.029*       | DNA-bSi20@FSA_6h - DNA-bSi30@FSA_12h  | 0.096        |
| Si10@FSA_6h - Si30@FSA_12h      | 0.025*       | DNA-bSi30@FSA_6h - FSA_12h            | 0.145        |
| Si10@FSA_6h - DNA@FSA_12h       | 0.031*       | DNA-bSi30@FSA_6h - Si10@FSA_12h       | 0.199        |
| Si10@FSA_6h - DNA-bSi10@FSA_12h | 0.029*       | DNA-bSi30@FSA_6h - Si20@FSA_12h       | 0.321        |
| Si10@FSA_6h - DNA-bSi20@FSA_12h | 0.002***     | DNA-bSi30@FSA_6h - Si30@FSA_12h       | 0.351        |
| Si10@FSA_6h - DNA-bSi30@FSA_12h | 0.000****    | DNA-bSi30@FSA_6h - DNA@FSA_12h        | 0.307        |
| Si20@FSA_6h - Si30@FSA_6h       | 0.930        | DNA-bSi30@FSA_6h - DNA-bSi10@FSA_12h  | 0.321        |
| Si20@FSA_6h - DNA@FSA_6h        | 0.861        | DNA-bSi30@FSA_6h - DNA-bSi20@FSA_12h  | 0.977        |
| Si20@FSA_6h - DNA-bSi10@FSA_6h  | 0.953        | DNA-bSi30@FSA_6h - DNA-bSi30@FSA_12h  | 0.600        |
| Si20@FSA_6h - DNA-bSi20@FSA_6h  | 0.351        | FSA_12h - Si10@FSA_12h                | 0.793        |
| Si20@FSA_6h - DNA-bSi30@FSA_6h  | 0.038*       | FSA_12h - Si20@FSA_12h                | 0.641        |
| Si20@FSA_6h - FSA_12h           | 0.540        | FSA_12h - Si30@FSA_12h                | 0.600        |
| Si20@FSA_6h - Si10@FSA_12h      | 0.431        | FSA_12h - DNA@FSA_12h                 | 0.662        |
| Si20@FSA_6h - Si20@FSA_12h      | 0.281        | FSA_12h - DNA-bSi10@FSA_12h           | 0.641        |
| Si20@FSA_6h - Si30@FSA_12h      | 0.255        | FSA_12h - DNA-bSi20@FSA_12h           | 0.153        |
| Si20@FSA_6h - DNA@FSA_12h       | 0.294        | FSA_12h - DNA-bSi30@FSA_12h           | 0.047*       |
| Si20@FSA_6h - DNA-bSi10@FSA_12h | 0.281        | Si10@FSA_12h - Si20@FSA_12h           | 0.771        |
| Si20@FSA_6h - DNA-bSi20@FSA_12h | 0.041*       | Si10@FSA_12h - Si30@FSA_12h           | 0.726        |
| Si20@FSA_6h - DNA-bSi30@FSA_12h | 0.009**      | Si10@FSA_12h - DNA@FSA_12h            | 0.793        |
| Si30@FSA_6h - DNA@FSA_6h        | 0.930        | Si10@FSA_12h - DNA-bSi10@FSA_12h      | 0.771        |
| Si30@FSA_6h - DNA-bSi10@FSA_6h  | 0.884        | Si10@FSA_12h - DNA-bSi20@FSA_12h      | 0.210        |
| Si30@FSA_6h - DNA-bSi20@FSA_6h  | 0.307        | Si10@FSA_12h - DNA-bSi30@FSA_12h      | 0.071        |
| Si30@FSA_6h - DNA-bSi30@FSA_6h  | 0.031*       | Si20@FSA_12h - Si30@FSA_12h           | 0.953        |
| Si30@FSA_6h - FSA_12h           | 0.484        | Si20@FSA_12h - DNA@FSA_12h            | 0.977        |
| Si30@FSA_6h - Si10@FSA_12h      | 0.382        | Si20@FSA_12h - DNA-bSi10@FSA_12h      | 1.000        |
| Si30@FSA_6h - Si20@FSA_12h      | 0.243        | Si20@FSA_12h - DNA-bSi20@FSA_12h      | 0.336        |
| Si30@FSA_6h - Si30@FSA_12h      | 0.221        | Si20@FSA_12h - DNA-bSi30@FSA_12h      | 0.129        |
| Si30@FSA_6h - DNA@FSA_12h       | 0.255        | Si30@FSA_12h - DNA@FSA_12h            | 0.930        |
| Si30@FSA_6h - DNA-bSi10@FSA_12h | 0.243        | Si30@FSA_12h - DNA-bSi10@FSA_12h      | 0.953        |
| Si30@FSA_6h - DNA-bSi20@FSA_12h | 0.033*       | Si30@FSA_12h - DNA-bSi20@FSA_12h      | 0.366        |
| Si30@FSA_6h - DNA-bSi30@FSA_12h | 0.007**      | Si30@FSA_12h - DNA-bSi30@FSA_12h      | 0.145        |
| DNA@FSA_6h - DNA-bSi10@FSA_6h   | 0.816        | DNA@FSA_12h - DNA-bSi10@FSA_12h       | 0.977        |
| DNA@FSA_6h - DNA-bSi20@FSA_6h   | 0.210        | DNA@FSA_12h - DNA-bSi20@FSA_12h       | 0.321        |
| DNA@FSA_6h - DNA-bSi30@FSA_6h   | 0.025*       | DNA@FSA_12h - DNA-bSi30@FSA_12h       | 0.122        |
| DNA@FSA_6h - FSA_12h            | 0.431        | DNA-bSi10@FSA_12h - DNA-bSi20@FSA_12h | 0.336        |
| DNA@FSA_6h - Si10@FSA_12h       | 0.336        | DNA-bSi10@FSA_12h - DNA-bSi30@FSA_12h | 0.129        |
| DNA@FSA_6h - Si20@FSA_12h       | 0.210        | DNA-bSi20@FSA_12h - DNA-bSi30@FSA_12h | 0.580        |

**Table S9.** Intergroup statistical comparisons of antioxidant ability and ROS scavenging effect of hydrogel.

| Sample 1 - Sample 2                           | Significance        |                       |
|-----------------------------------------------|---------------------|-----------------------|
|                                               | Antioxidant ability | ROS scavenging effect |
| Control - H <sub>2</sub> O <sub>2</sub>       | 0.000****           | 0.004***              |
| Control - FSA                                 | 0.000****           | 0.048*                |
| Control - DNA@FSA                             | 0.000****           | 0.199                 |
| Control - Si30@FSA                            | 0.000****           | 0.231                 |
| Control - DNA-bSi30@FSA                       | 0.002***            | 0.701                 |
| H <sub>2</sub> O <sub>2</sub> - FSA           | 0.225               | 0.716                 |
| H <sub>2</sub> O <sub>2</sub> - DNA@FSA       | 0.005**             | 0.263                 |
| H <sub>2</sub> O <sub>2</sub> - Si30@FSA      | 0.002***            | 0.228                 |
| H <sub>2</sub> O <sub>2</sub> - DNA-bSi30@FSA | 0.000****           | 0.050                 |
| FSA - DNA@FSA                                 | 0.264               | 0.943                 |
| FSA - Si30@FSA                                | 0.120               | 0.914                 |
| FSA - DNA-bSi30@FSA                           | 0.002***            | 0.426                 |
| DNA@FSA - Si30@FSA                            | 0.994               | 1.000                 |
| DNA@FSA - DNA-bSi30@FSA                       | 0.089               | 0.891                 |
| Si30@FSA - DNA-bSi30@FSA                      | 0.201               | 0.925                 |

**Table S10.** Intergroup statistical comparisons of relative dermis thickness, thickness of epidermis, thickness of granulation tissue, and collagen density of skin tissue extracted from diabetic mouse model after 15 days.

| Sample 1 - Sample 2      | Significance              |                                                |                                                |                  |
|--------------------------|---------------------------|------------------------------------------------|------------------------------------------------|------------------|
|                          | Relative dermis thickness | Thickness of epidermis                         | Thickness of granulation tissue                | Collagen density |
| Saline - FSA             | 0.715                     | Not statistically different between the groups | Not statistically different between the groups | 0.768            |
| Saline - DNA@FSA         | 0.144                     |                                                |                                                | 0.168            |
| Saline - Si30@FSA        | 0.028*                    |                                                |                                                | 0.023*           |
| Saline - DNA-bSi30@FSA   | 0.005**                   |                                                |                                                | 0.001***         |
| FSA - DNA@FSA            | 0.273                     |                                                |                                                | 0.685            |
| FSA - Si30@FSA           | 0.068                     |                                                |                                                | 0.140            |
| FSA - DNA-bSi30@FSA      | 0.014*                    |                                                |                                                | 0.005**          |
| DNA@FSA - Si30@FSA       | 0.465                     |                                                |                                                | 0.699            |
| DNA@FSA - DNA-bSi30@FSA  | 0.171                     |                                                |                                                | 0.034*           |
| Si30@FSA - DNA-bSi30@FSA | 0.523                     |                                                |                                                | 0.242            |

**Table S11.** Intergroup statistical comparisons of immunohistochemical factors (TGF- $\beta$ , MPO, VEGF, and CD31) of skin tissue extracted from diabetic mouse model after 15 days.

| Sample 1 - Sample 2      | Significance |          |          |           |
|--------------------------|--------------|----------|----------|-----------|
|                          | TGF- $\beta$ | MPO      | VEGF     | CD31      |
| Saline - FSA             | 0.523        | 0.523    | 0.300    | 0.535     |
| Saline - DNA@FSA         | 0.121        | 0.055    | 0.110    | 0.049*    |
| Saline - Si30@FSA        | 0.018*       | 0.045*   | 0.004*** | 0.003***  |
| Saline - DNA-bSi30@FSA   | 0.001***     | 0.001*** | 0.003*** | 0.000**** |
| FSA - DNA@FSA            | 0.361        | 0.201    | 0.952    | 0.468     |
| FSA - Si30@FSA           | 0.083        | 0.171    | 0.102    | 0.028*    |
| FSA - DNA-bSi30@FSA      | 0.011*       | 0.011*   | 0.071    | 0.000**** |
| DNA@FSA - Si30@FSA       | 0.411        | 0.927    | 0.280    | 0.349     |
| DNA@FSA - DNA-bSi30@FSA  | 0.100        | 0.201    | 0.202    | 0.001***  |
| Si30@FSA - DNA-bSi30@FSA | 0.411        | 0.235    | 0.999    | 0.013*    |

**Table S12.** Intergroup statistical comparisons of L929 proliferation by different DNA concentration.

| Sample 1 - Sample 2   | Significance |          |           |
|-----------------------|--------------|----------|-----------|
|                       | 1d           | 3d       | 5d        |
| 0 µg/mL - 25 µg/mL    | 0.022*       | 0.014*   | 0.002***  |
| 0 µg/mL - 50 µg/mL    | 0.182        | 0.171    | 0.937     |
| 0 µg/mL - 100 µg/mL   | 0.004***     | 0.273    | 0.136     |
| 0 µg/mL - 500 µg/mL   | 0.917        | 0.411    | 0.000**** |
| 25 µg/mL - 50 µg/mL   | 0.650        | 0.273    | 0.007**   |
| 25 µg/mL - 100 µg/mL  | 0.768        | 0.171    | 0.000**** |
| 25 µg/mL - 500 µg/mL  | 0.079        | 0.001*** | 0.000**** |
| 50 µg/mL - 100 µg/mL  | 0.154        | 0.784    | 0.042*    |
| 50 µg/mL - 500 µg/mL  | 0.521        | 0.028*   | 0.000**** |
| 100 µg/mL - 500 µg/mL | 0.013*       | 0.055    | 0.000**** |

**Table S13.** Intergroup statistical comparisons of hemolysis rates.

| Sample 1 - Sample 2              | Significance |
|----------------------------------|--------------|
| Positive control - FSA           | 0.000****    |
| Positive control - DNA@FSA       | 0.000****    |
| Positive control - Si30@FSA      | 0.000****    |
| Positive control - DNA-bSi30@FSA | 0.000****    |
| FSA - DNA@FSA                    | 1.000        |
| FSA - Si30@FSA                   | 1.000        |
| FSA - DNA-bSi30@FSA              | 1.000        |
| DNA@FSA - Si30@FSA               | 1.000        |
| DNA@FSA - DNA-bSi30@FSA          | 1.000        |
| Si30@FSA - DNA-bSi30@FSA         | 1.000        |

**Table S14.** Intergroup statistical comparisons of relative dermis thickness, thickness of epidermis, thickness of granulation tissue, and collagen density of skin tissue extracted from acute wound healing model after 10 days.

| Sample 1 - Sample 2      | Significance              |                                                |                                 |                  |
|--------------------------|---------------------------|------------------------------------------------|---------------------------------|------------------|
|                          | Relative dermis thickness | Thickness of epidermis                         | Thickness of granulation tissue | Collagen density |
| Saline - FSA             | 0.992                     | Not statistically different between the groups | 0.315                           | 0.768            |
| Saline - DNA@FSA         | 0.524                     |                                                | 0.144                           | 0.168            |
| Saline - Si30@FSA        | 0.043*                    |                                                | 0.036*                          | 0.023*           |
| Saline - DNA-bSi30@FSA   | 0.012*                    |                                                | 0.001***                        | 0.001***         |
| FSA - DNA@FSA            | 0.763                     |                                                | 0.648                           | 0.685            |
| FSA - Si30@FSA           | 0.083                     |                                                | 0.273                           | 0.140            |
| FSA - DNA-bSi30@FSA      | 0.023*                    |                                                | 0.028*                          | 0.005**          |
| DNA@FSA - Si30@FSA       | 0.432                     |                                                | 0.523                           | 0.699            |
| DNA@FSA - DNA-bSi30@FSA  | 0.141                     |                                                | 0.083                           | 0.034*           |
| Si30@FSA - DNA-bSi30@FSA | 0.916                     |                                                | 0.273                           | 0.242            |

**Table S15.** Intergroup statistical comparisons of immunohistochemical factors (TGF- $\beta$ , MPO, VEGF, and CD31) of skin tissue extracted from acute wound healing model after 10 days.

| Sample 1 - Sample 2      | Significance |          |                                                |           |
|--------------------------|--------------|----------|------------------------------------------------|-----------|
|                          | TGF- $\beta$ | MPO      | VEGF                                           | CD31      |
| Saline - FSA             | 0.528        | 0.273    | Not statistically different between the groups | 0.803     |
| Saline - DNA@FSA         | 0.251        | 0.171    |                                                | 0.024*    |
| Saline - Si30@FSA        | 0.001***     | 0.014*   |                                                | 0.002***  |
| Saline - DNA-bSi30@FSA   | 0.000****    | 0.001*** |                                                | 0.000**** |
| FSA - DNA@FSA            | 0.970        | 0.784    |                                                | 0.132     |
| FSA - Si30@FSA           | 0.009**      | 0.171    |                                                | 0.009**   |
| FSA - DNA-bSi30@FSA      | 0.001***     | 0.028*   |                                                | 0.001***  |
| DNA@FSA - Si30@FSA       | 0.022*       | 0.273    |                                                | 0.437     |
| DNA@FSA - DNA-bSi30@FSA  | 0.002***     | 0.055    |                                                | 0.037*    |
| Si30@FSA - DNA-bSi30@FSA | 0.490        | 0.411    |                                                | 0.471     |



Supporting movie file

**Video S1.** On-demand 3D printing of patient-customized functional hydrogel dressings with a non-lattice pattern (left) and a lattice pattern (right) using a diabetic ulcer foot model.
